# Supplementary material
Source: Springer Nature journal article supplement (https://www.springermedizin.de/resource/supplementary/12904_2013_213_MOESM9_ESM.docx/9517780)
Supplement: MOESM9 [file 9517780]

**Fig 5 Pre and Post Course Audit of Deceased Patient Records at Elm House**
